# Supplementary material for: V(DD)J recombination is an important and evolutionarily conserved mechanism for generating antibodies with unusually long CDR3s
Source: HighWire-hosted journal article supplement (doi:10.1101/gr.259598.119), 2020-09-18
Supplement: Supplemental_Table_S5.xlsx [file Supplemental_Table_S5.xlsx]

## Sheet: Legend
Supplemental Table S5. IGHD genes identified by SEARCH-D for eleven mammalian species from the Vertebrate Genome Project. Each sheet shows sequences of identified D genes and their RSSs for a single species. Sheets are named according to the common names of the species (e.g., common marmoset) and their VGP identifiers (e.g., mCalJac1). D genes are named according to their order in the IGHD locus.…

## Sheet: common_marmoset_mCalJac1
Name	Sequence	Left heptamer	Left nonamer	Right heptamer	Right nonamer
D1	CTAACTGGGGG	CACTGTG	GGTTTCAGC	CACAGTG	ACAAGAACC
D2	GGTATGGTGGGAGCTATTAC	CATGGTG	AGATTCTGA	CACTGTG	TCCAAAACT
D3	GGGTATATAGCGGCTGGGCC	CAGTGTG	GGTTTCTGA	CACAGTG	CCAGAAACC
D4	GTACTACTATACTGATGAATATGGTTATACTTACACC	CACTGTG	GGATTGGAG	CACAGCG	TCAAAAACC
D5	AGGGTATTGTACTAGTGGTACCTGCTATGCC	CACTGTG	GGATGTTGT	CACGGTG	TCCCAAAGC
D6	GGGTATATAGCAGCTGGGAC	CAGTGTG	GGTTTCTGA	CACAGTG	CCAGAAACC
D7	TAACTACGGTAACTAC	TACTGTG	GGTTTTTGT	CACAGTG	GAAAAAACC
D8	GGTATGGTGGCTCC	CACCATG	GGATTTTGA	CACAGCA	ACCAAAACC
D9	GGTATGGTGGCTCCCACAGCAG	CACCATG	GGATTTTGA	AGGAGCC	CCACAGGGC
D10	AGGGTATTGTACTAGTGGTACCTGCTATGCC	CACTGTG	GGATGTTGT	CACGGTG	TCCCAAAGC
D11	GGTATAGCTGGAACTAC	CACAGTG	AGATTCTGA	CACTGTA	TCCAAAACT
D12	GGGTATACTAGCGGATAC	CACCGTG	GGTTTCTGA	CACAGTG	ACAGAAACC
D13	TAACTACGGTAACTACGGTACCTAC	TACTGTG	GGTTTTTGT	CACAGTG	GAAAAAACC
D14	TAACTACGGTAACTAC	TACTGTG	GGTTTTTGT	CACAGTG	GAAAAAACC
D15	GTACTACTATGACCCTGTAACGAGTATCTTTTACCCC	CACTGTG	GGATTGGAG	CACAGTG	TCAAAAACC
D16	GGTACCCTGGGAACTAC	CACGGTG	GGATTCTGA	CACTGTG	TCTAAAACT

## Sheet: ring_tailed_lemur_mLemCat1
Name	Sequence	Left heptamer	Left nonamer	Right heptamer	Right nonamer
D1	TGAGTACTATAGTGATGGTGTTTACTATGGC	CACTGTG	GGATTTTGT	CACAGTG	CCCAAAACC
D2	GGAACTGGGGGAACAAC	CACTGTG	GGATTCTGA	CACTGTG	CCCAAAACC
D3	TACAGTAGCGGATGGGCC	CACAGTG	GGTTTCTGG	CACAGCG	GCAGAAACC
D4	GGAACTGGGGGAACAAC	CACTGTG	GGATTCTGA	CACTGTG	CCCAAAACC

## Sheet: European_otter_mLutLut1
Name	Sequence	Left heptamer	Left nonamer	Right heptamer	Right nonamer
D1	CTATATTGTGATAGTTACGGCAGCTGCTCC	CACGGTG	GGATTCGGG	CACAGCA	CCGGAAACC
D2	TAACTACGATAGCTACGGC	CACTGTG	GCTTTTTGA	CACAGTG	GCGAAAACC
D3	CTATATTGTGATAGTTACGGCAGCTGCTCC	CACGGTG	GGATTCGGG	CACAGCA	CCGGAAACC
D4	TTACTACAGTAGCTACGGCTACGGC	CACTGTG	GCTTTTTGA	CACAGTG	GCGAAAACC
D5	CTATATTGTGATAGTTACGGCAGCTGCTCC	CACGGTG	GGATTCGGG	CACAGCA	CCGGAAACC
D6	TTACTACAGTAGCTACGGCTACGGC	CACTGTG	GCTTTTTGA	CACAGTG	GCGAAAACC
D7	CTATATTGTGATAGTTACGGCAGCTGCTCC	CACGGTG	GGATTCGGG	CACAGCA	CCGGAAACC
D8	TTACTACAGTAGCTACGGCTACGGC	CACTGTG	GCTTTTTGA	CACAGTG	GCGAAAACC
D9	CTATATTGTGATAGTTACGGCAGCTGCTCC	CACGGTG	GGATTCGGG	CACAGCA	CCGGAAACC
D10	TTACTACGATAGCTACGGCTACAGC	CACTGTG	GCTTTTTGA	CACAGTG	GCGAAAACC
D11	CTATATTGTGATAGTTACGGCAGCTGCTCC	CACGGTG	GGATTCGGG	CACAGCA	CCGGAAACC
D12	TAACTACGGTACCTACAAC	CACTGTG	GCTTTTTGA	CACAGTG	GCGAAAACC
D13	GCTACAGTAGCTACTGGATC	CACCGTG	GGTTTCTGA	CACAGTG	CCACAAACC
D14	CTAACTGGAAC	CACAGTG	GGTTTTGGC	CACGGTG	ACAGAAACC

## Sheet: Canadian_lynx_mLynCan4
Name	Sequence	Left heptamer	Left nonamer	Right heptamer	Right nonamer
D1	GGTCACTCAAGACACCAGAGGGTGCTCAGGACTA	GGCGGGG	AGTTGCTCA	CACAGCA	CCTGAGCCC
D2	GTGATTACTGTATCGGGAGTAGCTGTGCTAC	CACTGTG	GGATTGGAG	CACAGCA	TCCAAAACC
D3	TTACTACGGTAGCTACTACGCC	TACTGTG	GCTTTTTGA	CACGGTG	GCAAAAACC
D4	GTGATTACTGTATCGGGAGTAGCTGTGCTAC	CACTGTG	GGATTGGAG	CACAGCA	TCCAAAACC
D5	TTACTACGATAGTGACTATGCC	TACTGTG	GCTTTTTGA	CACGGTG	GCAAAAACC
D6	GTATAGCGGAAGCTGGTCC	CATGGTG	GGTTTATGA	CACAGTG	CCGGAAACC

## Sheet: stoat_mMusErm1
Name	Sequence	Left heptamer	Left nonamer	Right heptamer	Right nonamer
D1	GTGTATTGTGATAGTTACGGCTGCTACTCC	CACGGTG	GGATTCGGG	CACAGCG	CCGAAAACC
D2	TTACTACGGTAGCTACAGC	CACTGTG	GTTTTTTGA	CACAGTG	GCAATAACC
D3	GTGTATTGTGATAGTTACGGCTGCTACTCC	CACGGTG	GGATTCGGG	CACAGCG	CCGAAAACC
D4	ATAACTACGATAACTAC	CACTGTG	GTTTTTTGA	CACAGCG	GCGAAAACC
D5	GCTACAGTAGCAGCTGGATC	CACTGTG	GGTTTCTGA	CACGGTG	CCACAAACC
D6	CTAACTGGGGC	CACAGTG	GGTTTTGGC	CACAGTG	ACAGAAACC

## Sheet: vaquita_mPhoSin1
Name	Sequence	Left heptamer	Left nonamer	Right heptamer	Right nonamer
D1	GTATTACTACTGCTCGGGGTGTAGCTGGTATTATACCCACAGCAT	CACTGTG	GGATTGGGA	CACAGCA	CCCGCCCCG
D2	ATACTATGCTGGATAC	TACTGTG	GCTTTTTGC	CACAGCG	GCAAAAACC

## Sheet: pale_spear_nosed_bat_mPhyDis1
Name	Sequence	Left heptamer	Left nonamer	Right heptamer	Right nonamer
D1	CTACTACTGTAGTGGTAGTAGTTGTTACTAC	CACTGTG	GGATTTGGG	CACAATG	TCAAAAACC
D2	GGTATGGTGTTAC	CACCATG	GGATTTTGA	CACAGCA	ACACAAACC
D3	TTACTATAACTAC	CACTGTG	GGTTTTTGC	CACAGTG	CCATAAACC
D4	GGAAAACCTC	CACAGTG	AGATTCAGC	CACAGTG	CCAAACAGC
D5	GTATTATAGTGTATCGTAC	CACTGTG	GGTTTATGG	CACAGTG	TCGGAAACC
D6	GAATGGGTGAAA	TGTGGTG	GGTTGCCAG	AGGTGAG	TCCAAATTG
D7	GTATATAGCGGATGGTAC	CACTGTG	GGTTTGTGG	CACAGTG	TCAGAAACC
D8	GAATGGGTGAAA	TGTGGTG	GGTTGCCAG	AGGTGAG	TCCAAATTG
D9	GTATAGTAGGAACTGGGCC	CACTGTG	GGTTTATGG	CACAGTG	TCAGAAACC
D10	GAATGGGTGAAA	TGTGGTG	GGTTGCCAG	AGGTGAG	TCCAAATTG
D11	GTATATAGCAGCGGATAC	CACTGTG	GGTTTATGG	CACAGTG	TCAGACACC
D12	GAATGGGTGAAA	TGTGGTG	GGTTGCCAG	AGGTGAG	TCCAAATTG
D13	GTATGGTAGCAGCTGGTAC	CACTGTG	AGTTTATGG	CACAGTG	TCAGAAACC
D14	GTATGGTAGTGGCTGGGCC	CACTGTG	GGTTTATGG	CACAGTG	TCAGAAACC
D15	GAATGAGTGAAA	TGTGGTG	GGTTGCCAG	AGGTGAG	TCCAAATGG
D16	GTATATAGCAGCGGATAC	CACTGTG	GGTTTATGG	CACAGTG	TCAGACACC
D17	GCAACTGGGAC	CACAGTG	GGTTTTGGG	CACAGTG	ACAAAAACT

## Sheet: greater_horseshoe_bat_mRhiFer1
Name	Sequence	Left heptamer	Left nonamer	Right heptamer	Right nonamer
D1	ATACTACTATAGTAGTGGTTATTAC	CACTGTG	GGATTTTGT	CACAGTG	CCAAAATCC
D2	ATACTACTATAGTAGTGGTTATTACCACAGTGA	CACTGTG	GGATTTTGT	CACAGCG	CCCACCCGA
D3	GTATACTAGCAGCTGGTAC	CACCGTG	GGTTTCTGG	CACAGTG	ACAGAAACC
D4	CTAACTGGAAC	CACAGTG	GGTTTTGGC	CACGGTG	ACAAAAACC

## Sheet: Eurasian_red_squirrel_mSciVul1
Name	Sequence	Left heptamer	Left nonamer	Right heptamer	Right nonamer
D1	TCTAGCTGACTATGGCTAC	TACTGTG	GGTTATTGT	CACAGTG	GCAGCAACT
D2	TCTATGGTATAGCTAC	CACTGTG	ACATATTGT	CACAGTG	TCCCAAAGC
D3	GTAACTGGAAC	CACAGTG	GGTTTTGGC	CACAGTG	ACAAAAACC

[truncated: 2 more sheets: grey_squirrel_mSciCar1, California_sea_lion_mZalCal1]
